# Supplementary material for: Family Decision Making and Self-Determination Among Consumers With Schizophrenia in China: Cross-Cultural Implications
Source: Atypon-hosted journal article supplement (doi:10.1176/appi.ps.201500255), 2017-12-15
Supplement: appi.ps.201500255.ds001.pdf [file appi.ps.201500255.ds001.pdf]

## Supplemental Information

## Appendix 1. Factorial structure with loadings on the CFDMS

| Items                                                     | Psychiatric<br>Care/Treatment |                  | Personal/Social<br>Function |                  | Daily Living |                  | Community Living |                  |
|-----------------------------------------------------------|-------------------------------|------------------|-----------------------------|------------------|--------------|------------------|------------------|------------------|
|                                                           | Consumer                      | Family<br>member | Consumer                    | Family<br>member | Consumer     | Family<br>member | Consumer         | Family<br>member |
|                                                           | Whether to take medication    | .483             | .705                        | .128             | -.095        | .234             | .034             | .131             |
| Whether to stop medication                                | .712                          | .722             | .134                        | .129             | .013         | .100             | -.022            | -.083            |
| Whether to decrease medication                            | .760                          | .787             | .123                        | -.019            | .014         | .032             | .064             | -.019            |
| Whether to follow medication regiment                     | .725                          | .707             | -.024                       | -.030            | .139         | -.014            | .124             | .242             |
| Whether to admitted to the psychiatric<br>hospital        | .698                          | .747             | .145                        | .053             | .050         | .012             | -.040            | .118             |
| Whether to be discharged from the psychiatric<br>hospital | .672                          | .757             | .233                        | .055             | .016         | .077             | -.094            | -.014            |
| To choose a psychiatrist                                  | .657                          | .592             | .002                        | .197             | .126         | .018             | .197             | .208             |
| Whether to attend follow-up visits                        | .691                          | .558             | -.039                       | .121             | .154         | .051             | .367             | .355             |
| Whether to participated in rehabilitation                 | .557                          | .526             | .059                        | .271             | .153         | .227             | .368             | .192             |
| Whether to return to work                                 | .133                          | .116             | .658                        | .749             | .148         | .279             | .255             | .142             |
| Whether o choose the type of occupations and<br>jobs      | .117                          | .098             | .692                        | .703             | .188         | .235             | .270             | .245             |
| Whether to return to school                               | .156                          | .069             | .773                        | .770             | .182         | .259             | .175             | .019             |
| Whether to move out from the family                       | .084                          | .167             | .522                        | .499             | .008         | .068             | .360             | .388             |

|                                                               |       |       |      |      |       |      |      |       |
|---------------------------------------------------------------|-------|-------|------|------|-------|------|------|-------|
| Whether to choose friends                                     | .185  | -.009 | .640 | .665 | .517  | .389 | .016 | .031  |
| Whether to get married                                        | .127  | .048  | .625 | .714 | .511  | .357 | .087 | .179  |
| Whether to date                                               | .105  | .031  | .635 | .708 | .500  | .390 | .103 | .067  |
| Whether to plan for daily activities                          | .225  | .013  | .192 | .132 | .720  | .687 | .103 | .271  |
| Whether to participate in leisure and recreational activities | .203  | -.010 | .119 | .353 | .733  | .688 | .100 | .166  |
| What to wear                                                  | .109  | -.015 | .124 | .154 | .759  | .782 | .176 | .054  |
| Whether to have religion                                      | -.050 | .026  | .381 | .206 | .492  | .640 | .184 | .038  |
| Whether to find some hobbies                                  | .056  | .268  | .144 | .008 | .695  | .738 | .162 | -.021 |
| Whether to purchase an expensive item (over \$500)            | .201  | .155  | .332 | .415 | -.114 | .022 | .523 | .658  |
| Whether to have a personal budget                             | .161  | .184  | .178 | .196 | .367  | .540 | .386 | .471  |
| Whether to go on a vacation                                   | .161  | .096  | .116 | .109 | .234  | .374 | .638 | .648  |
| Whether to participate in community activities                | -.026 | .118  | .224 | .339 | .455  | .691 | .651 | .192  |
| Whether to participate in community volunteer activities      | -.068 | .121  | .288 | .367 | .400  | .680 | .662 | .153  |
| Whether to purchase medical insurance                         | .181  | .199  | .206 | .086 | .088  | .209 | .683 | .750  |

Tucker's congruence coefficient for similarity between two exploratory factor analyses was .94
